# Supplementary material for: Efficient Ullmann C–N coupling catalyzed by a recoverable oligose-supported copper complex
Source: Royal Society of Chemistry journal article supplement (doi:10.1039/c6ra13536f), 2016-01-01

## **Efficient Ullmann C-N coupling catalyzed by the recoverable oligose-supported copper complex**

Xin Ge <sup>ab</sup>, Xinzhi Chen <sup>b</sup>, Chao Qian <sup>b\*</sup> and Shaodong Zhou <sup>c\*</sup>

<sup>a</sup> *School of Chemical and Material Engineering, Jiangnan University, Wuxi, P.R China*

<sup>b</sup> *Key Laboratory of Biomass Chemical Engineering of Ministry of Education, College of Chemical and Biological Engineering, Zhejiang University, Hangzhou, P.R China.*

<sup>c</sup> *Institut für Chemie, Technische Universität Berlin, Straße des 17. Juni 135, 10623 Berlin, Germany*

---

\* Corresponding author. Chao Qian, E-mail: [qianchao@zju.edu.cn](mailto:qianchao@zju.edu.cn) and Shaodong Zhou, E-mail: [shaodong.zhou@campus.tu-berlin.de](mailto:shaodong.zhou@campus.tu-berlin.de)

## General procedure of Cu@CDs synthesis

The CDs (5.0 g) were suspended in de-ionized water (100ml). Copper salt (1.0 g) was added to this suspending liquid and the reaction mixture was stirred for 12 h at 50 °C. The catalyst Cu@CDs was obtained by centrifugal separation and then vacuum dry at 60 °C.

**Fig.S1. XRD Patter of CuI@ $\beta$ -CD**

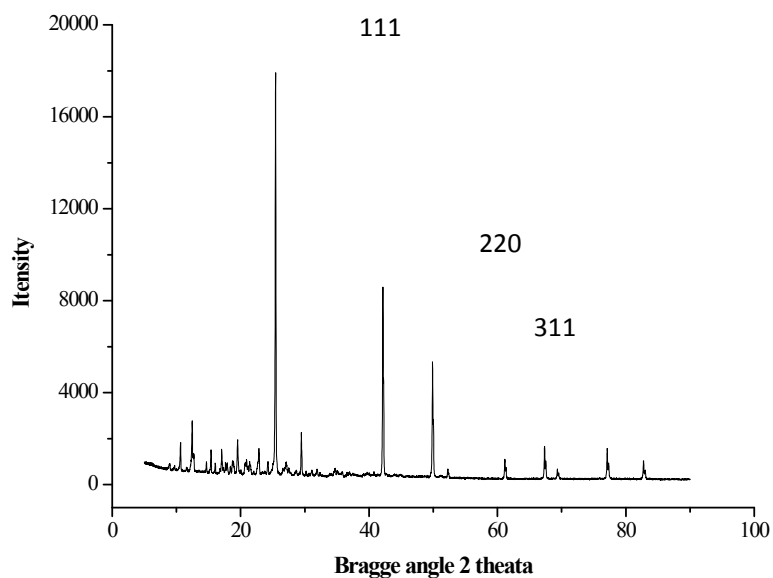

# NMR spectra of products

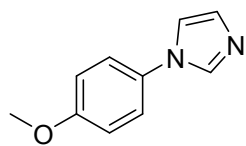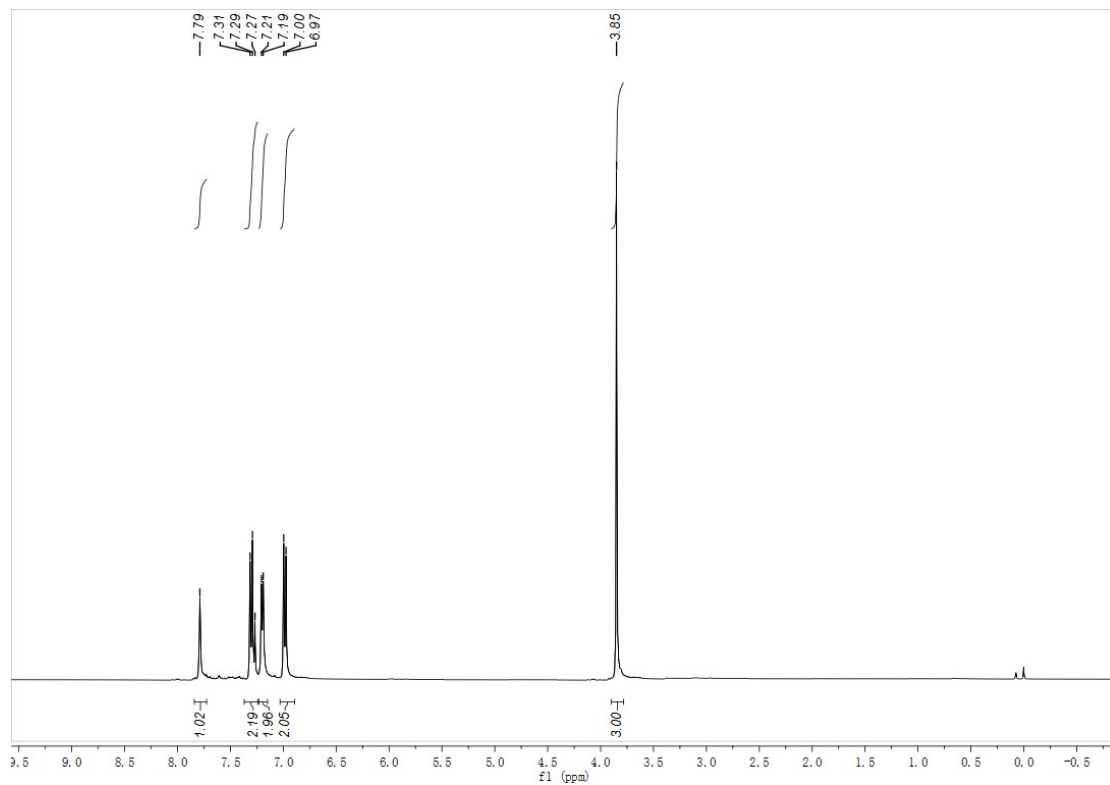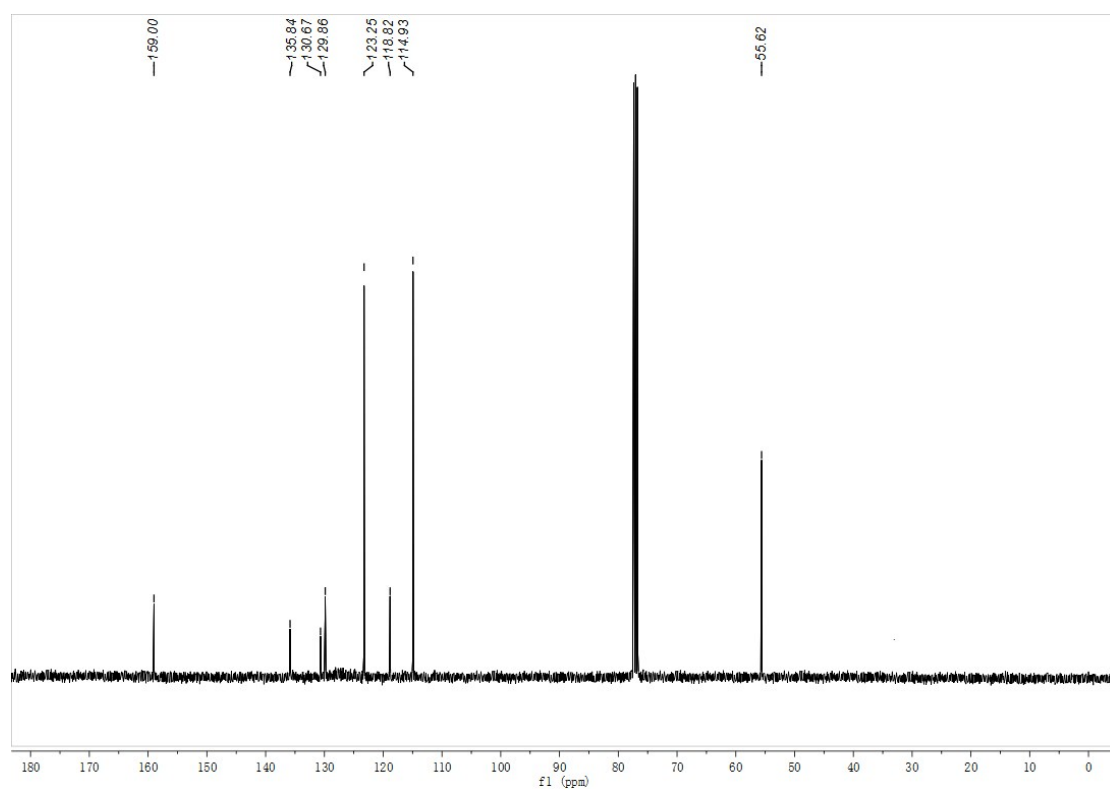

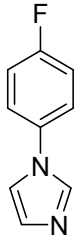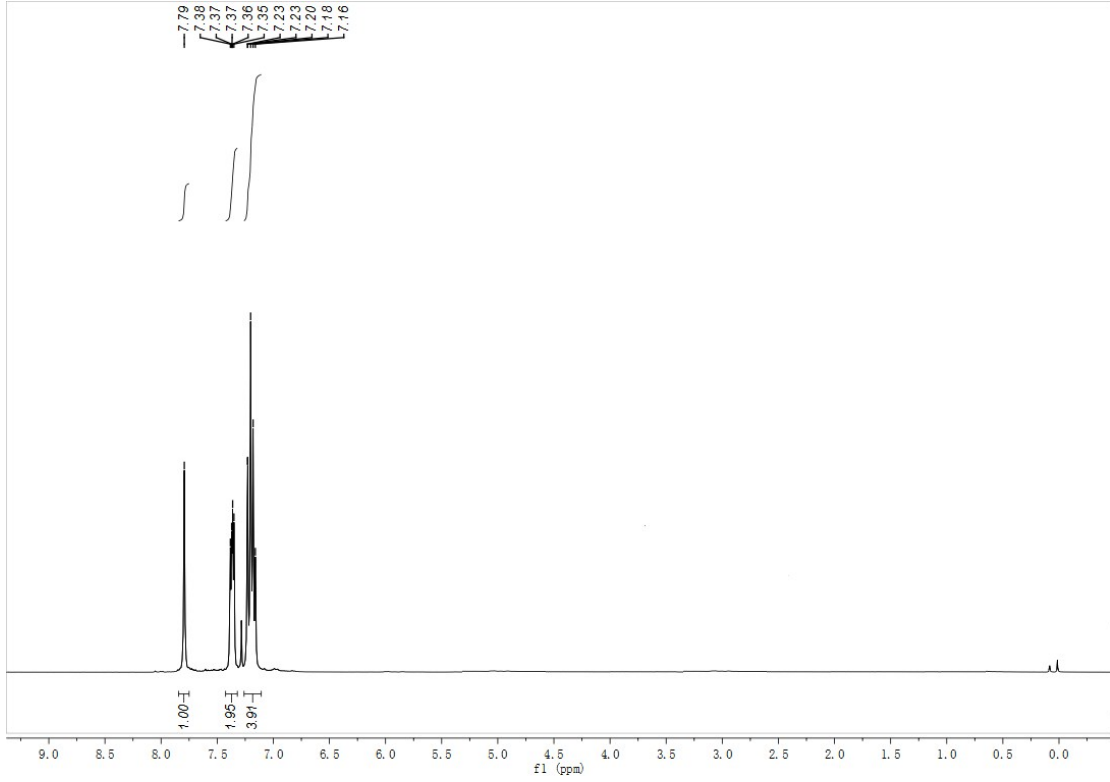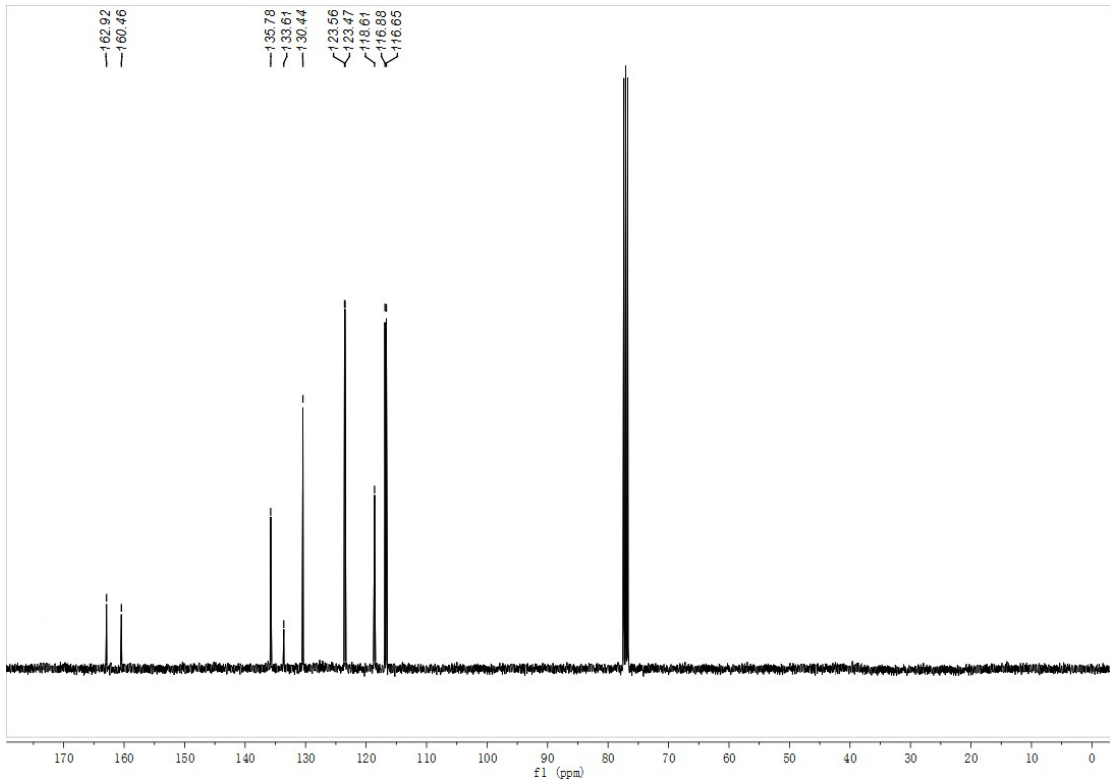

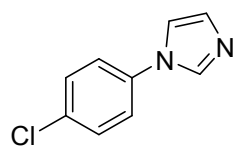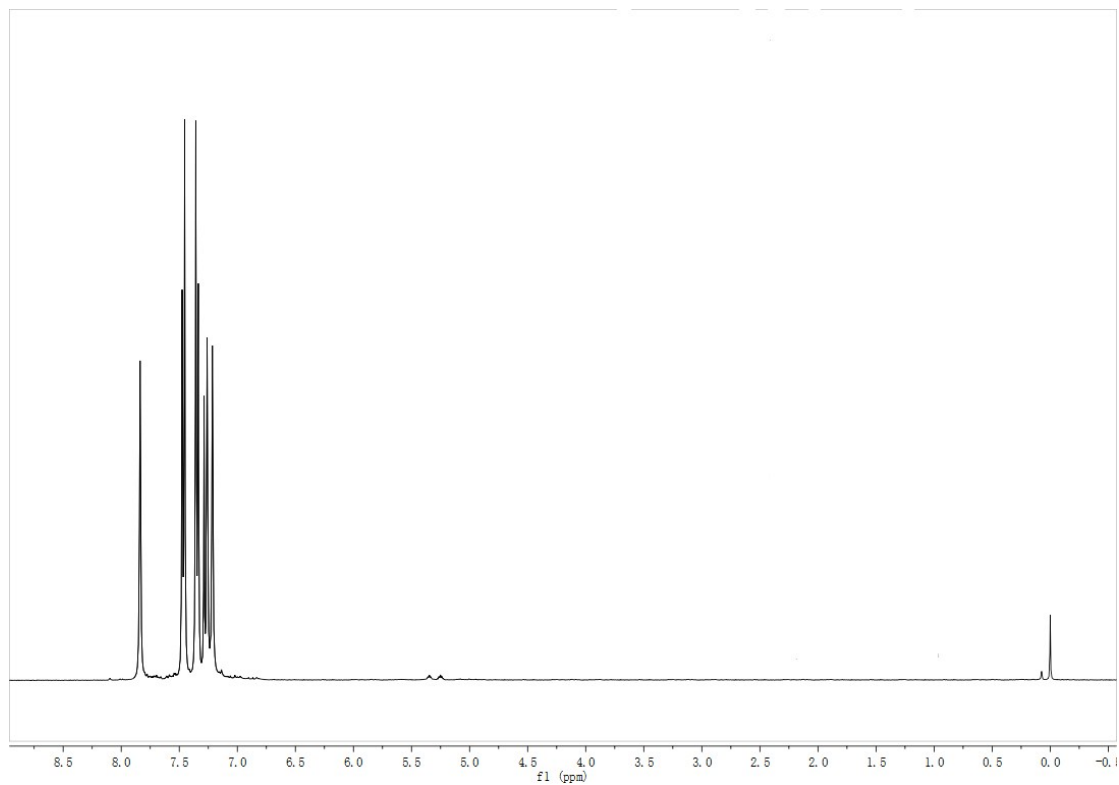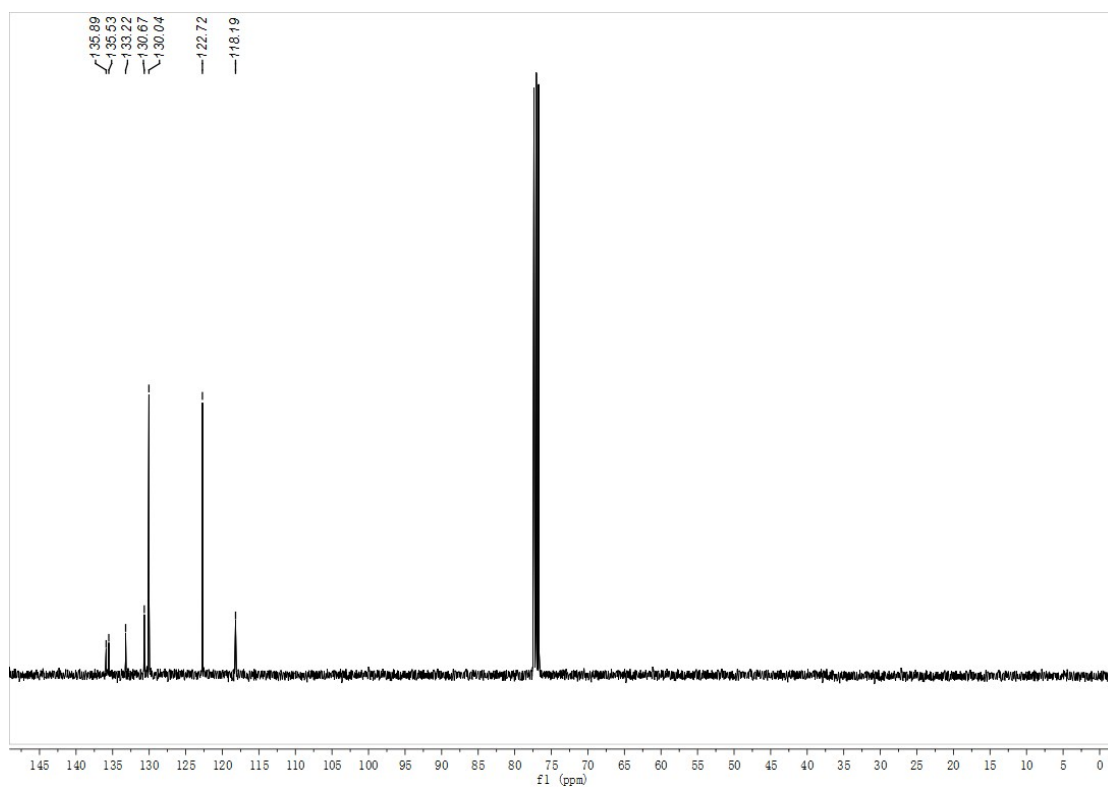

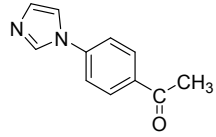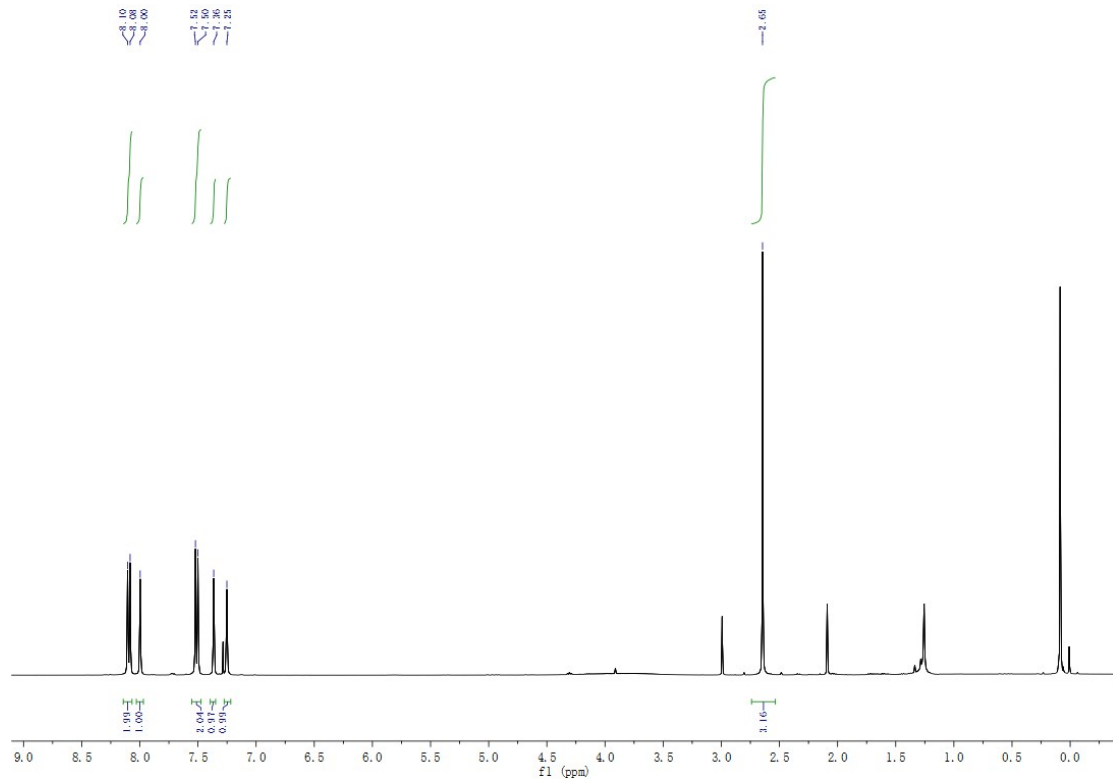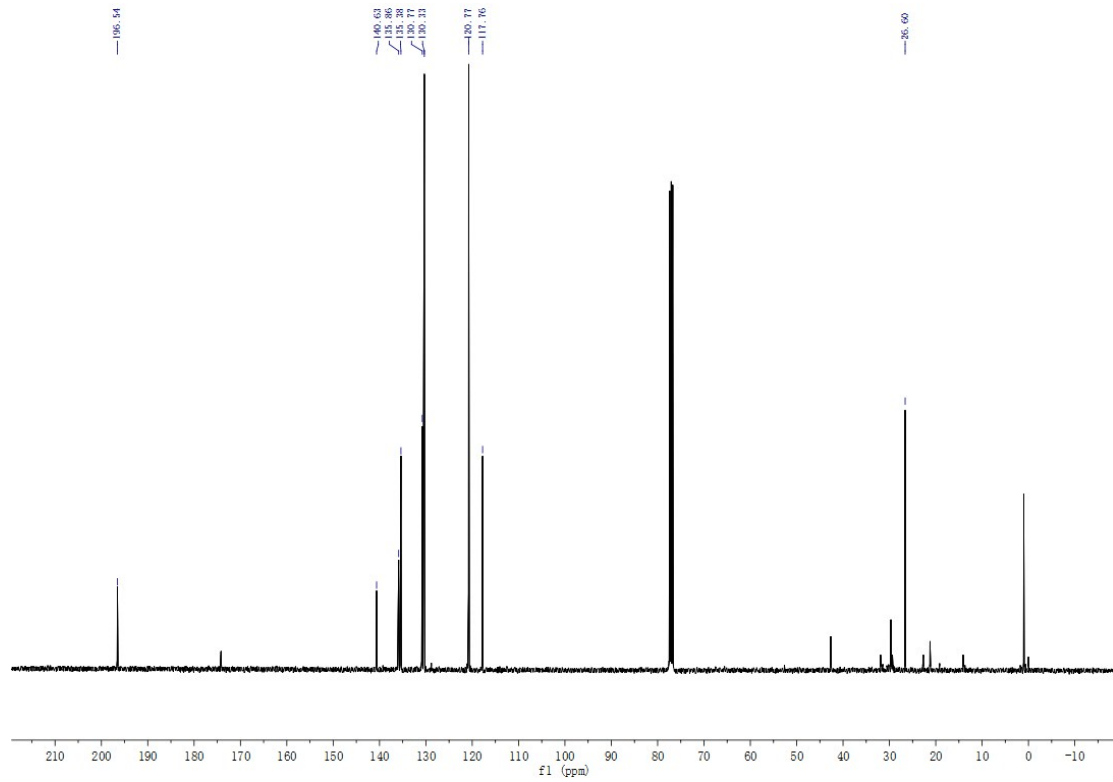

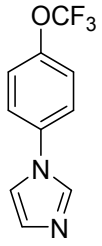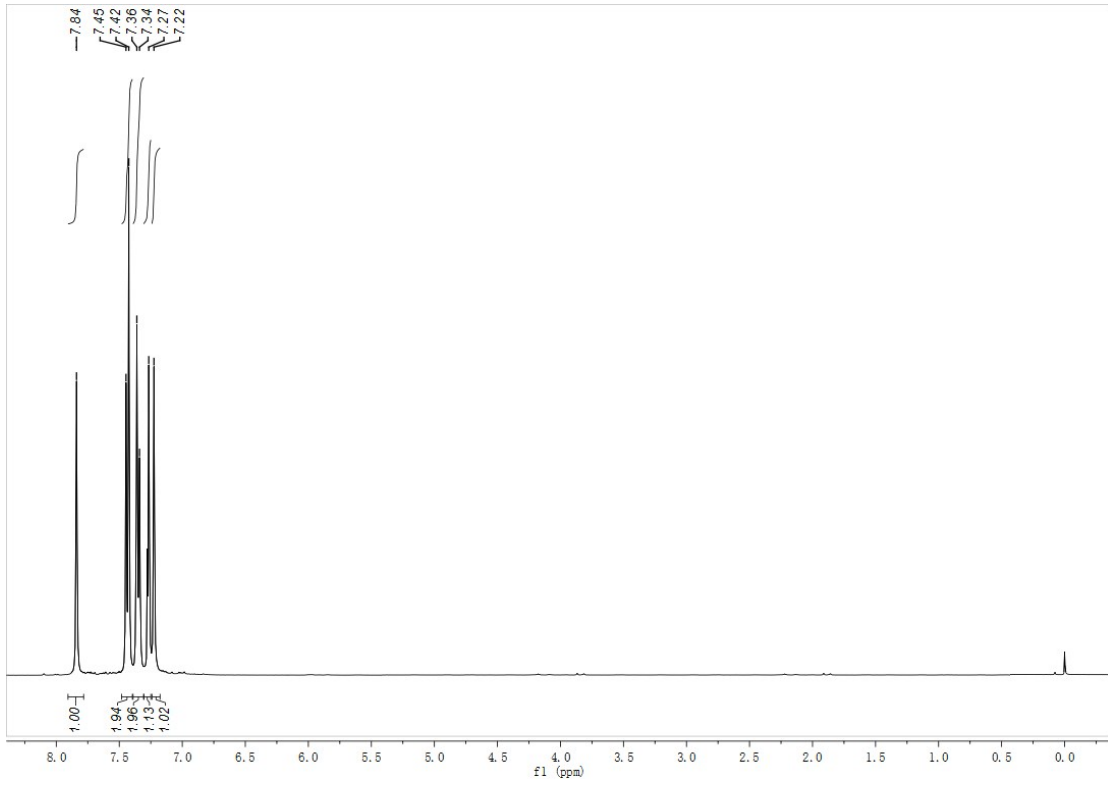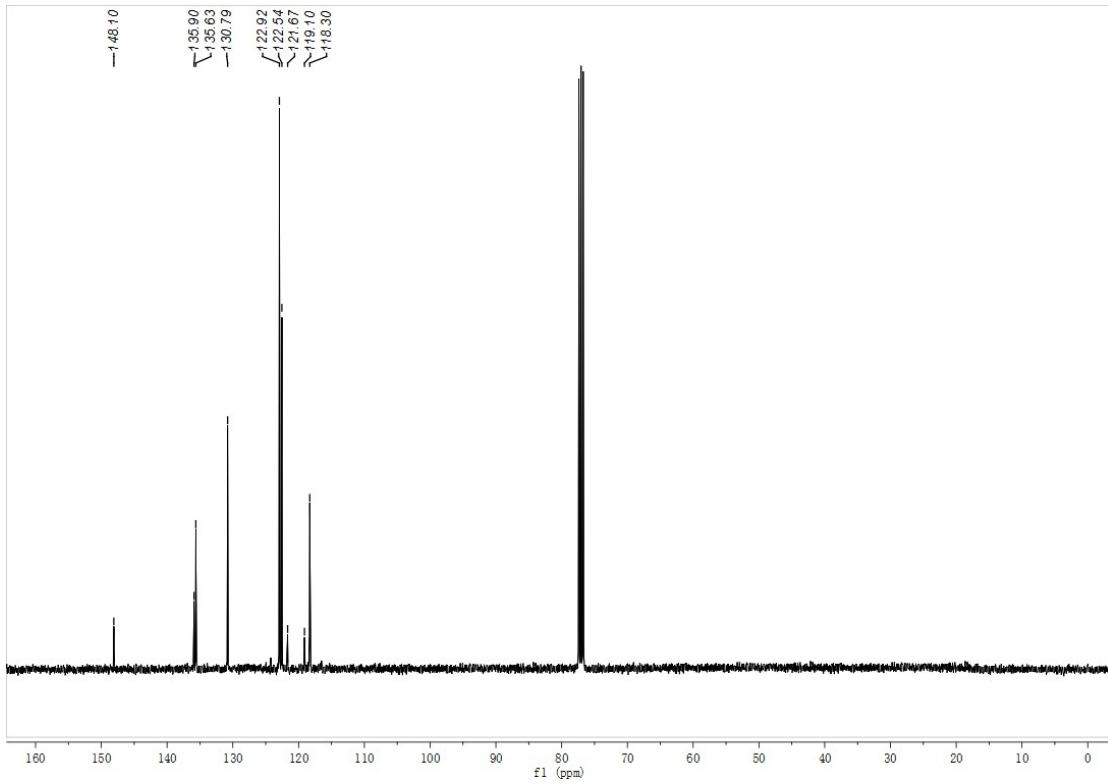

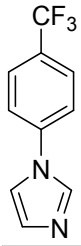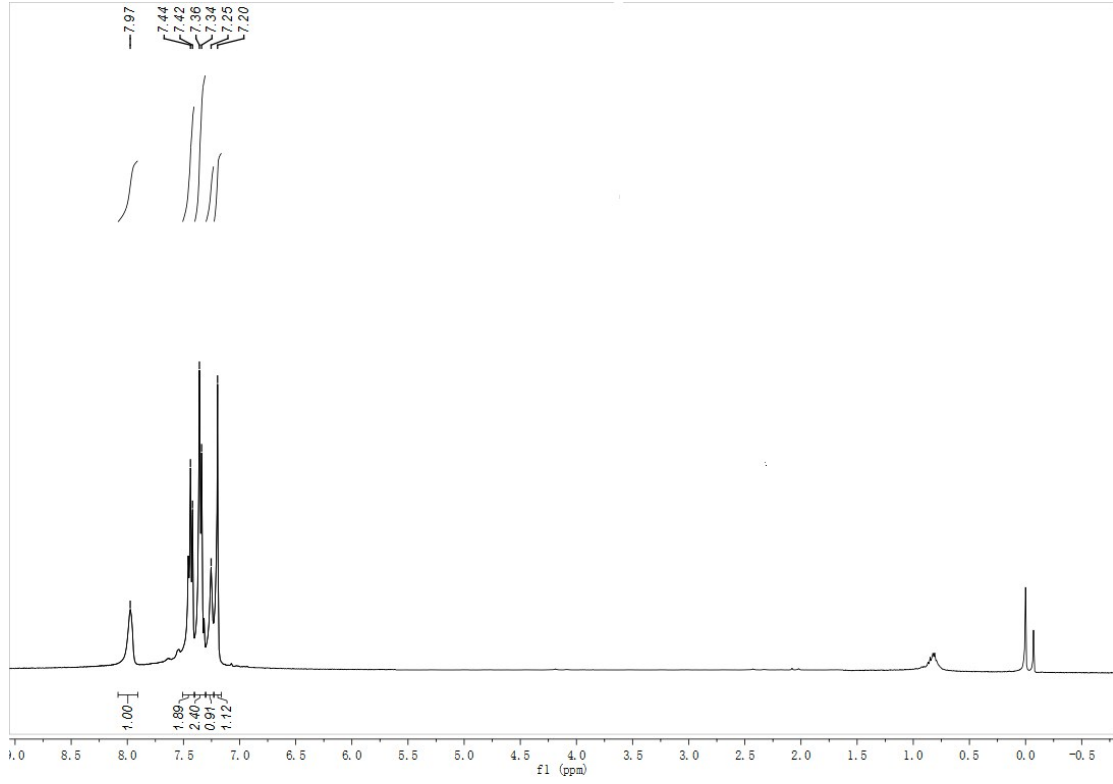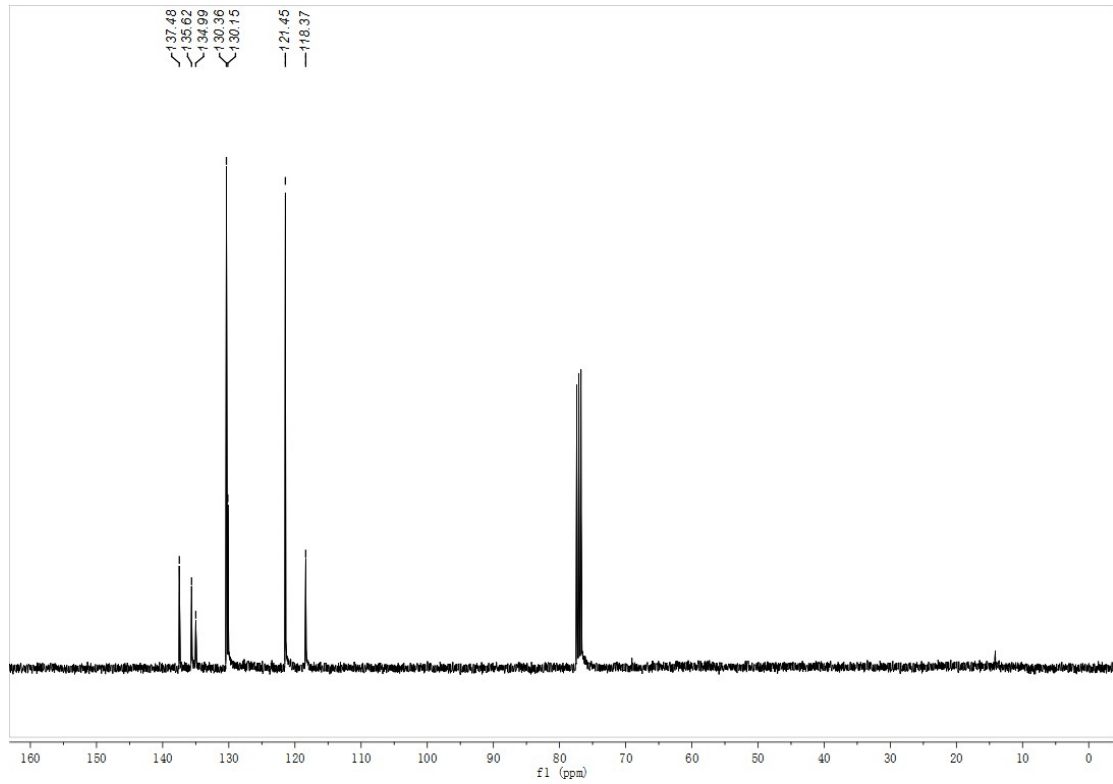



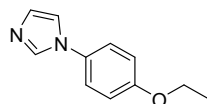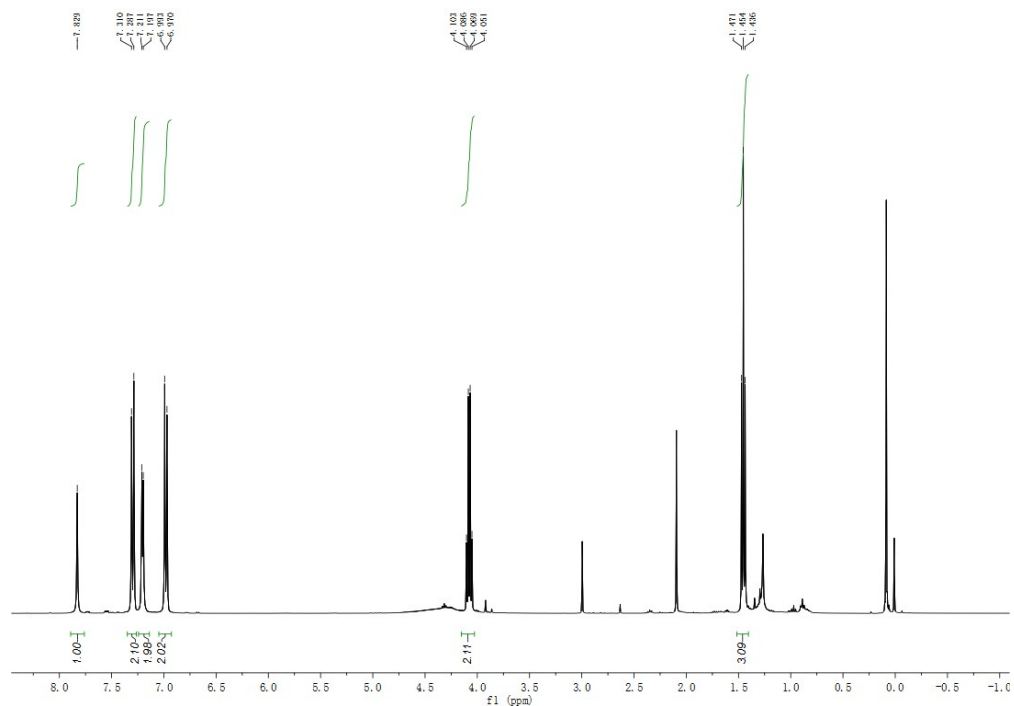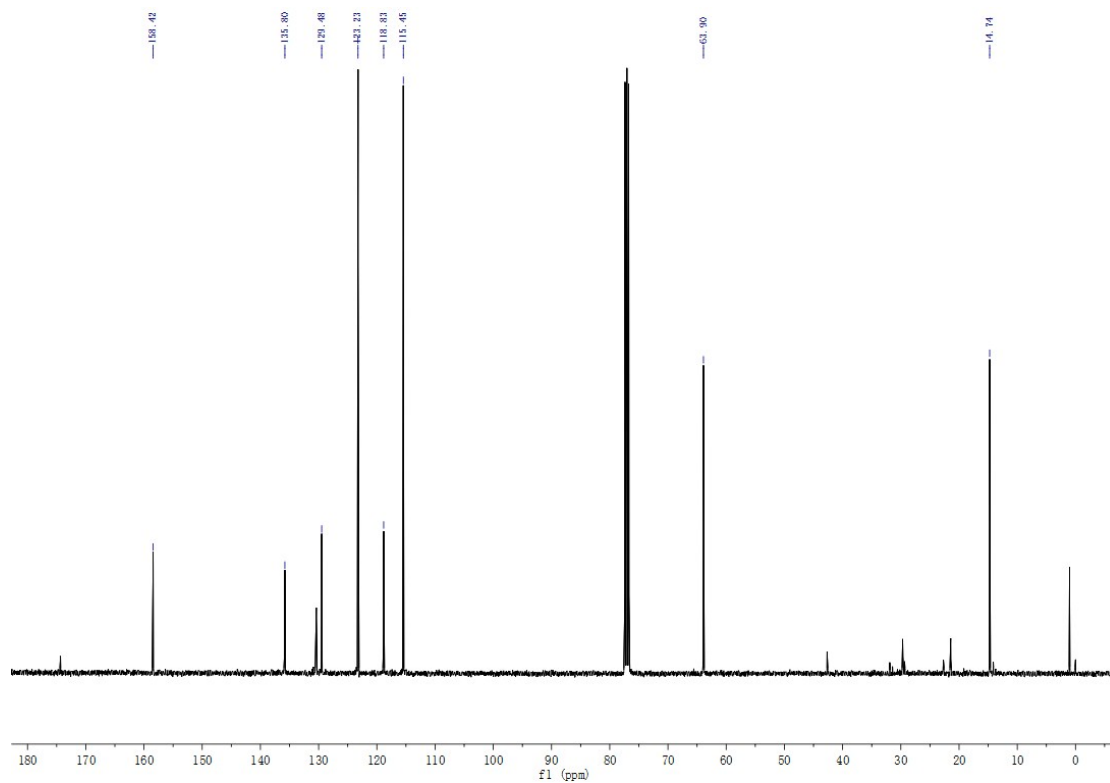

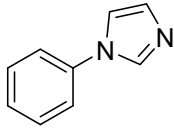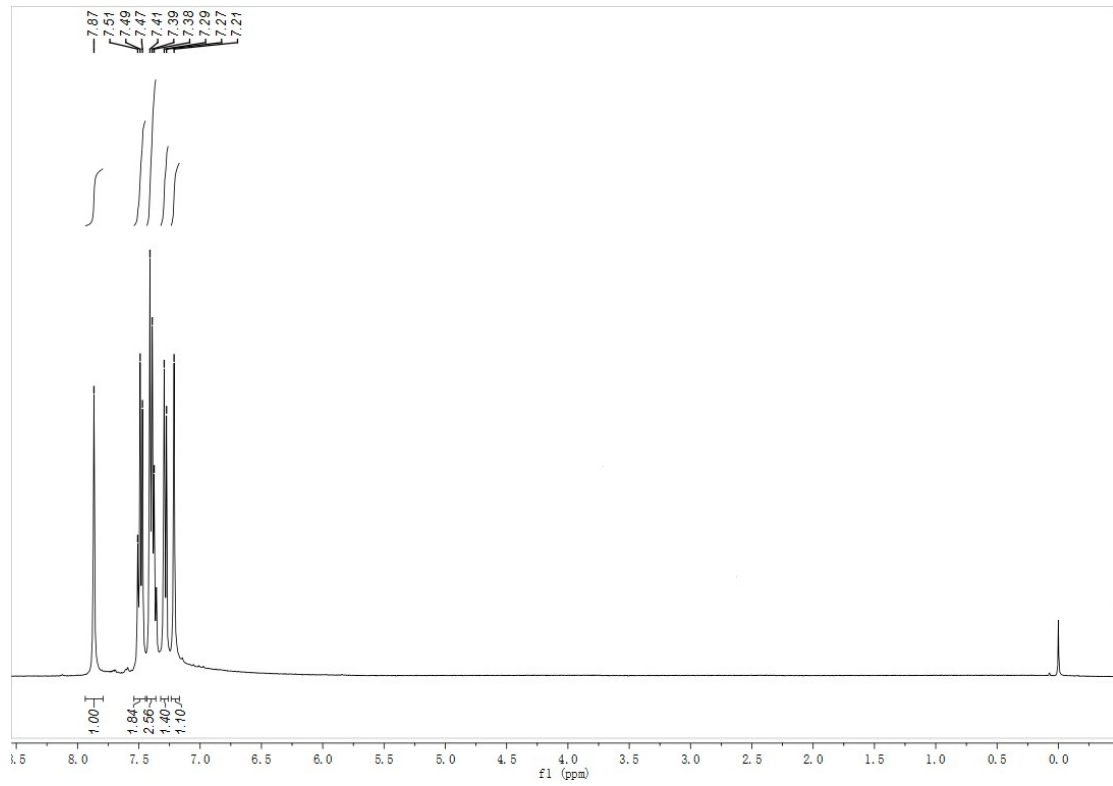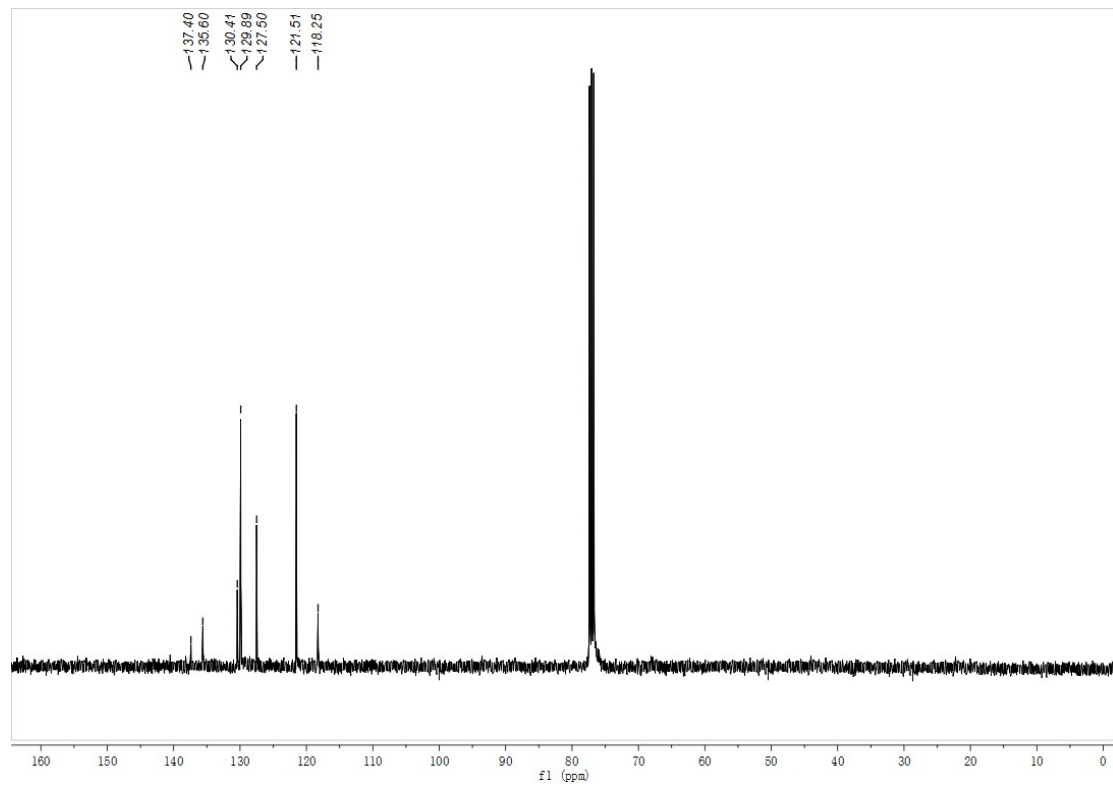

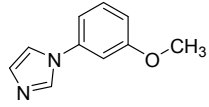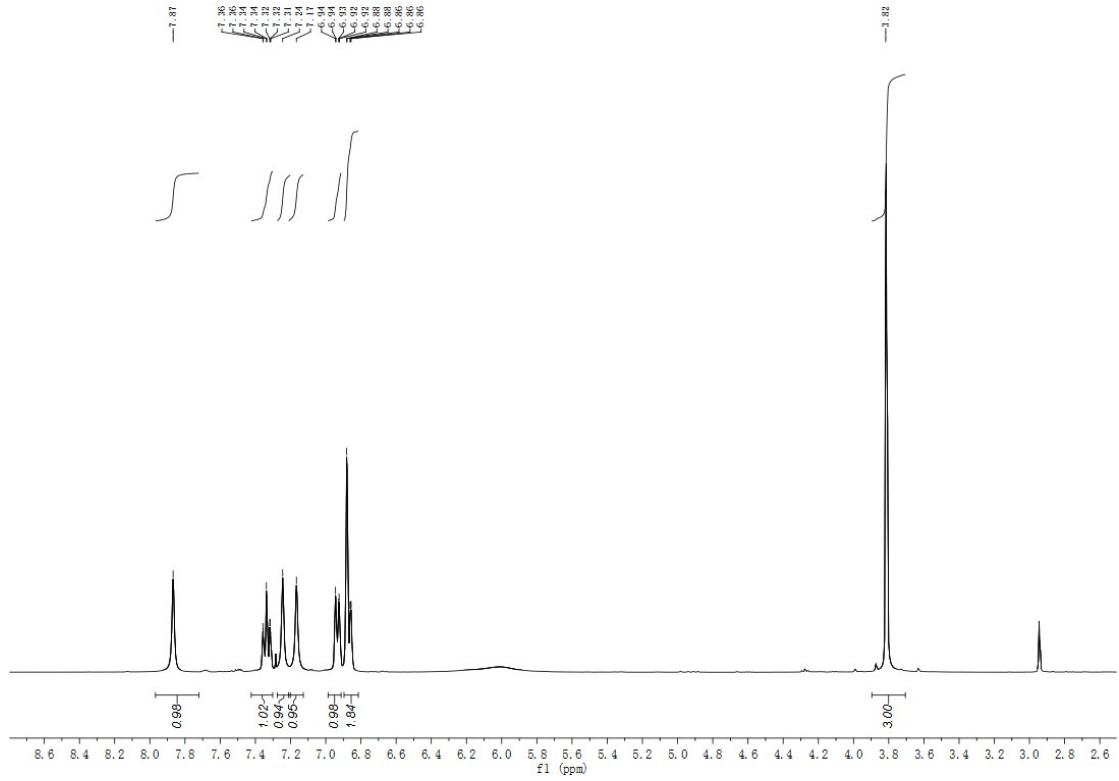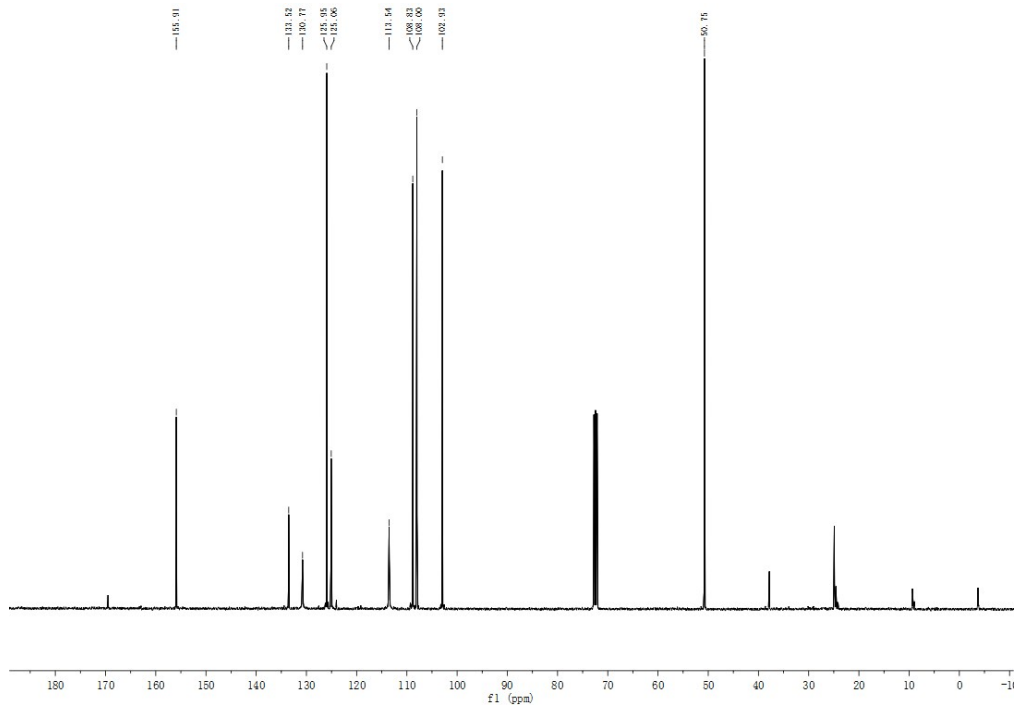

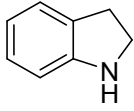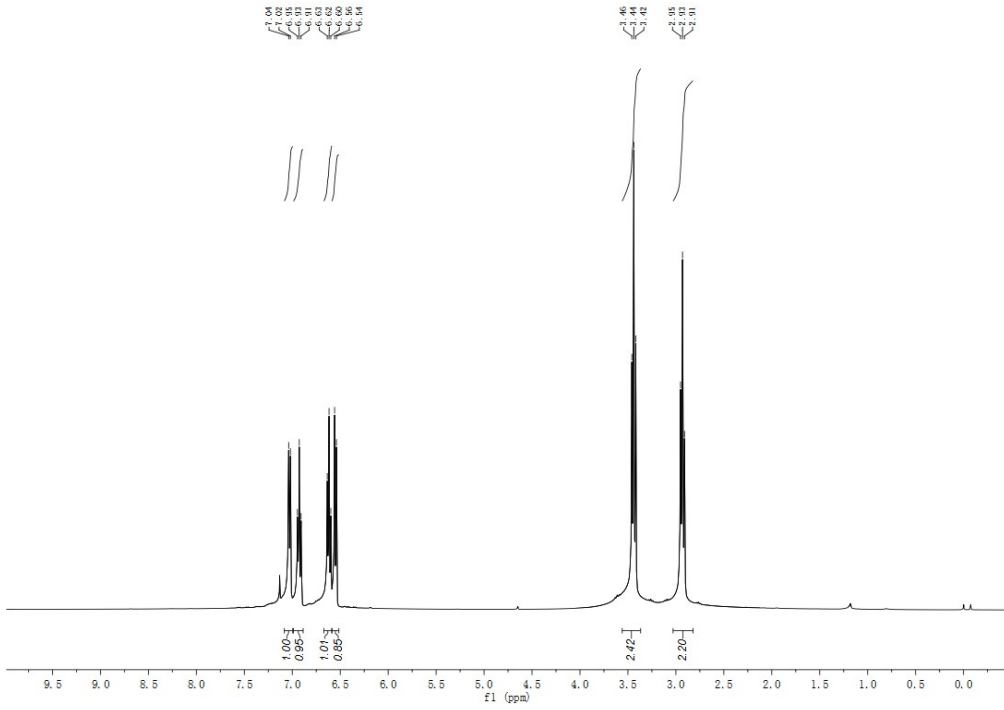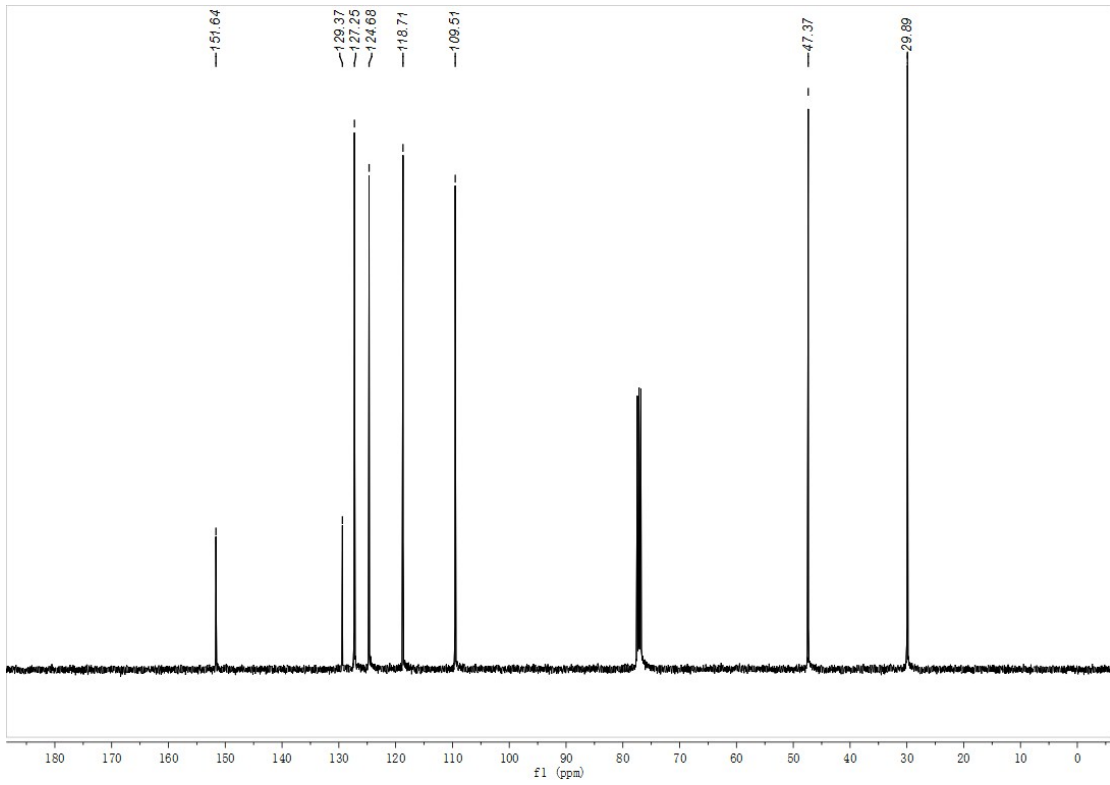

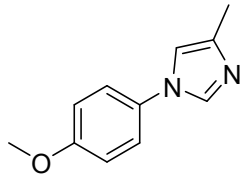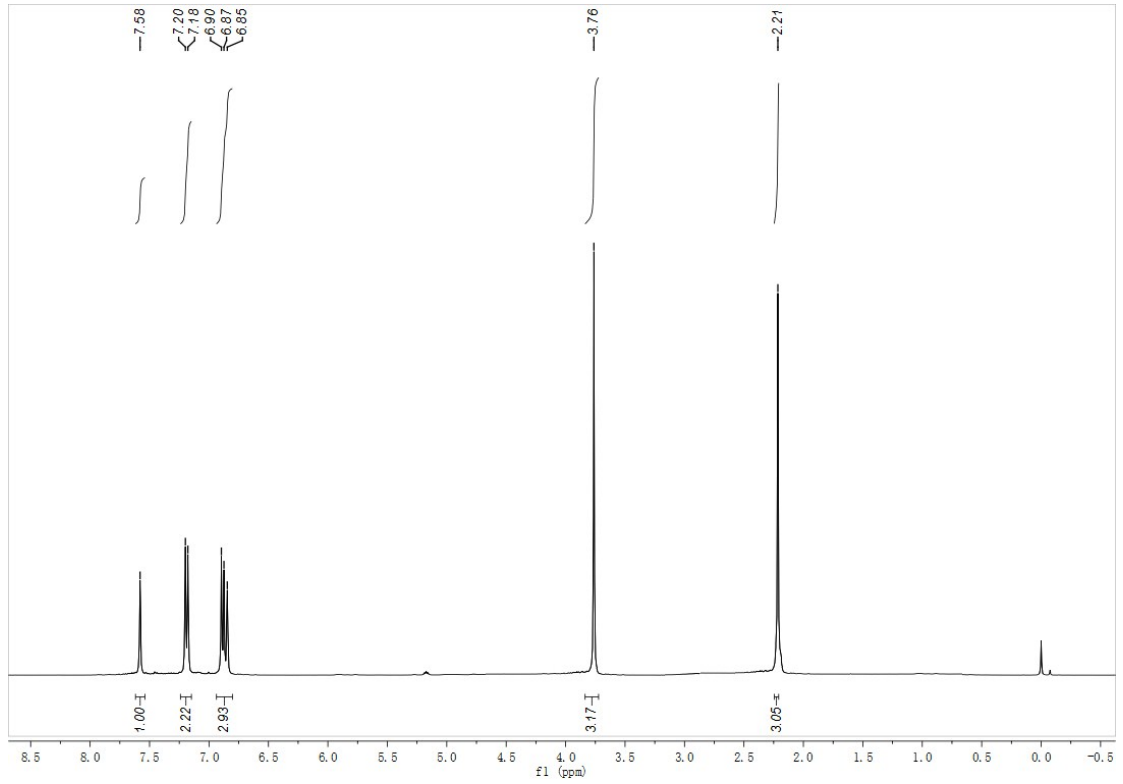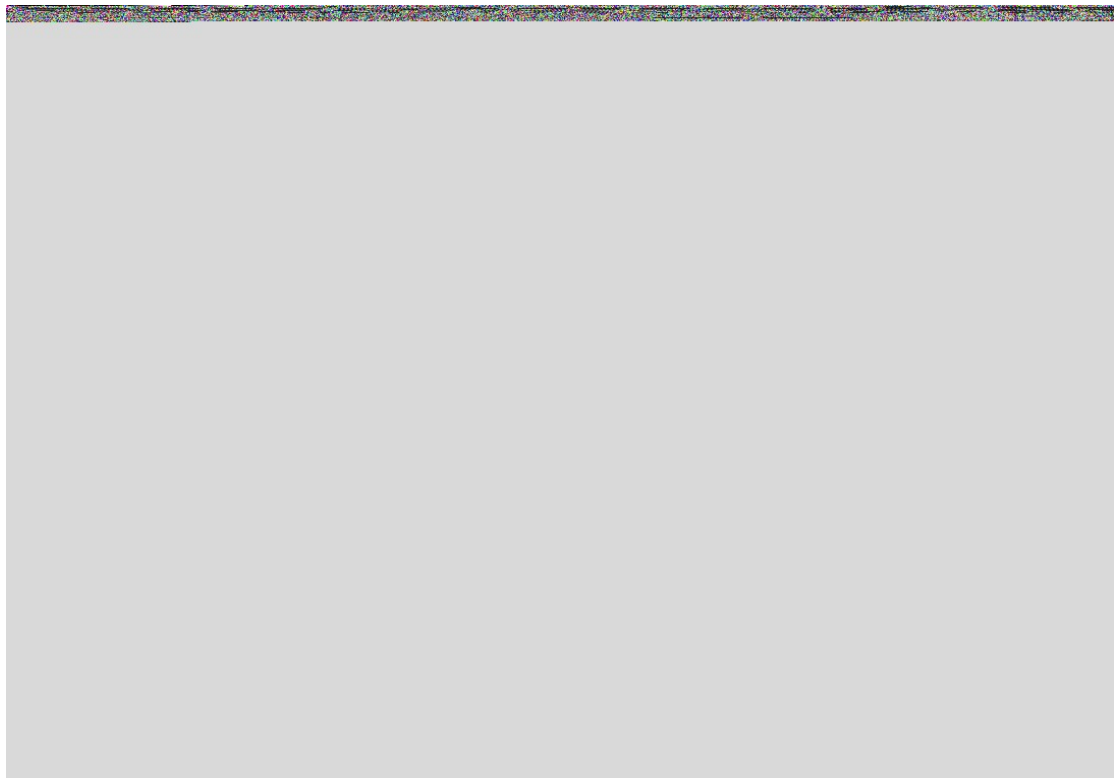

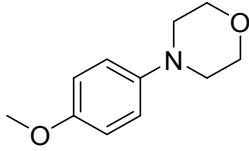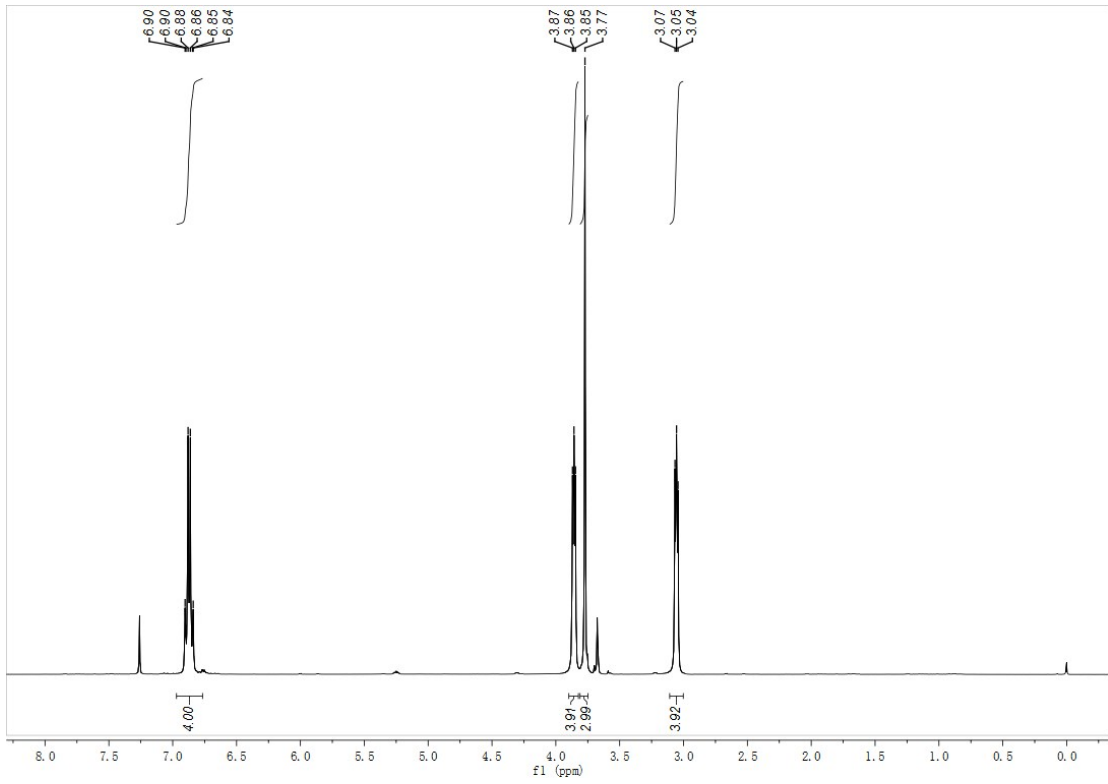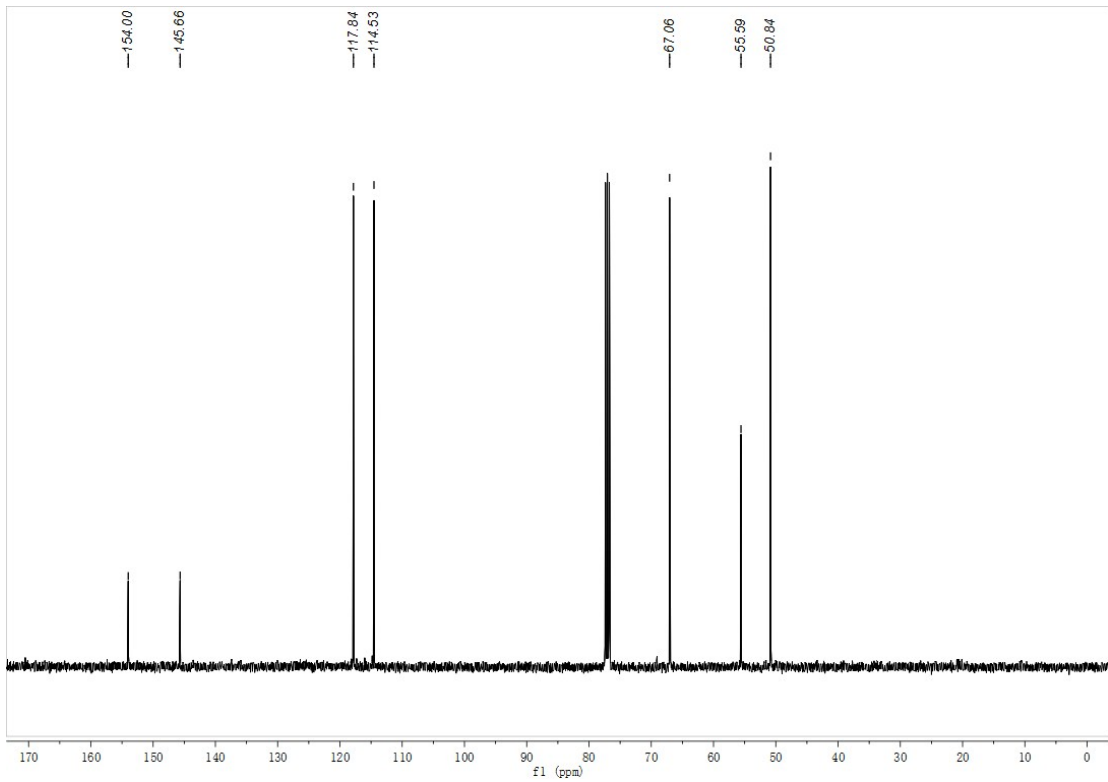

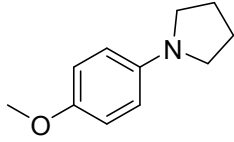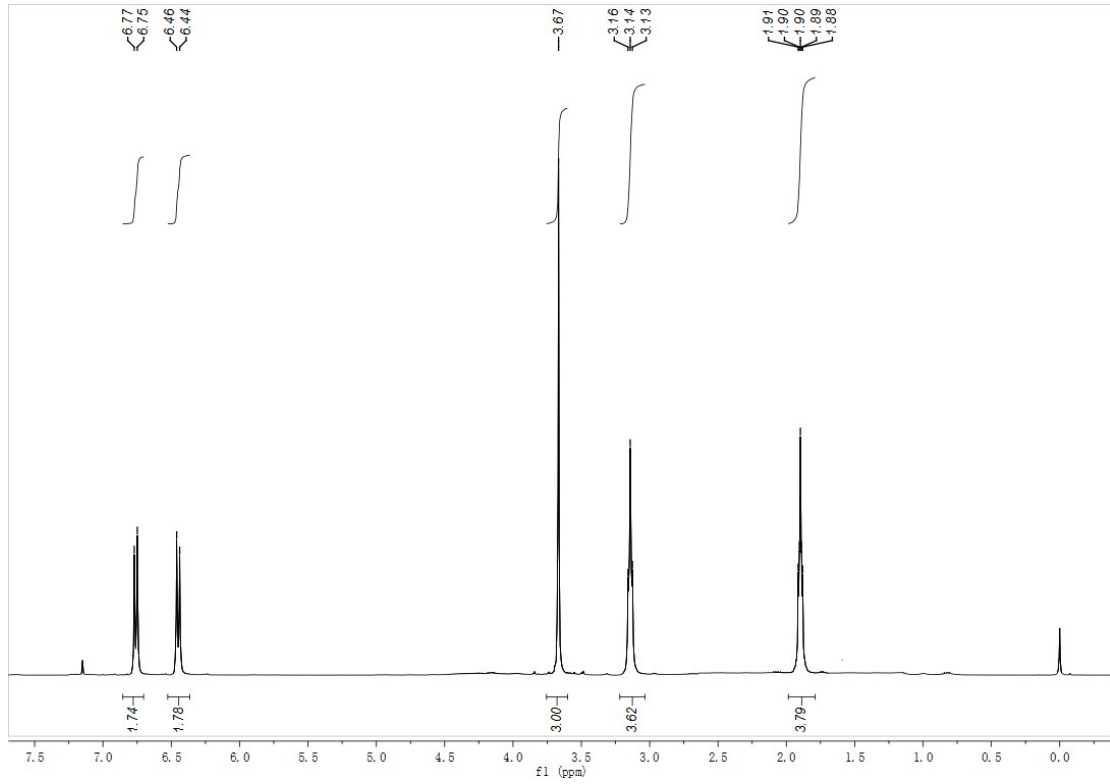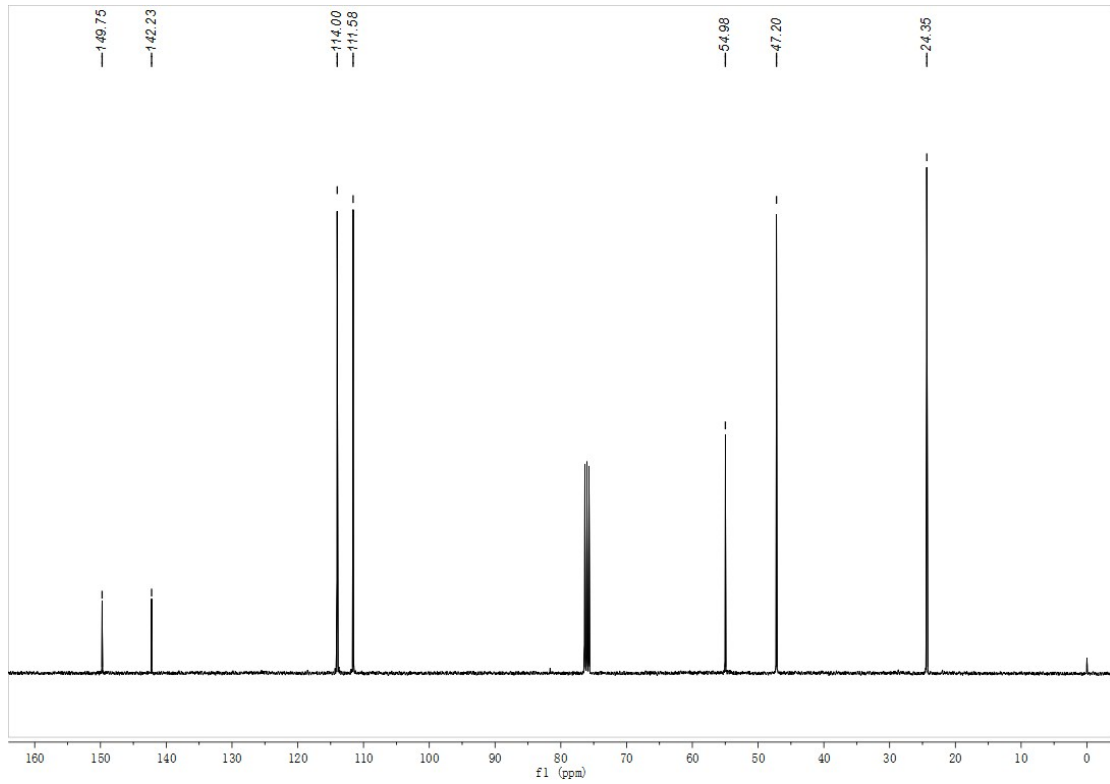

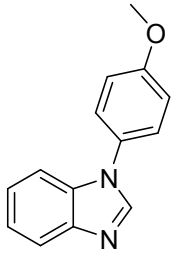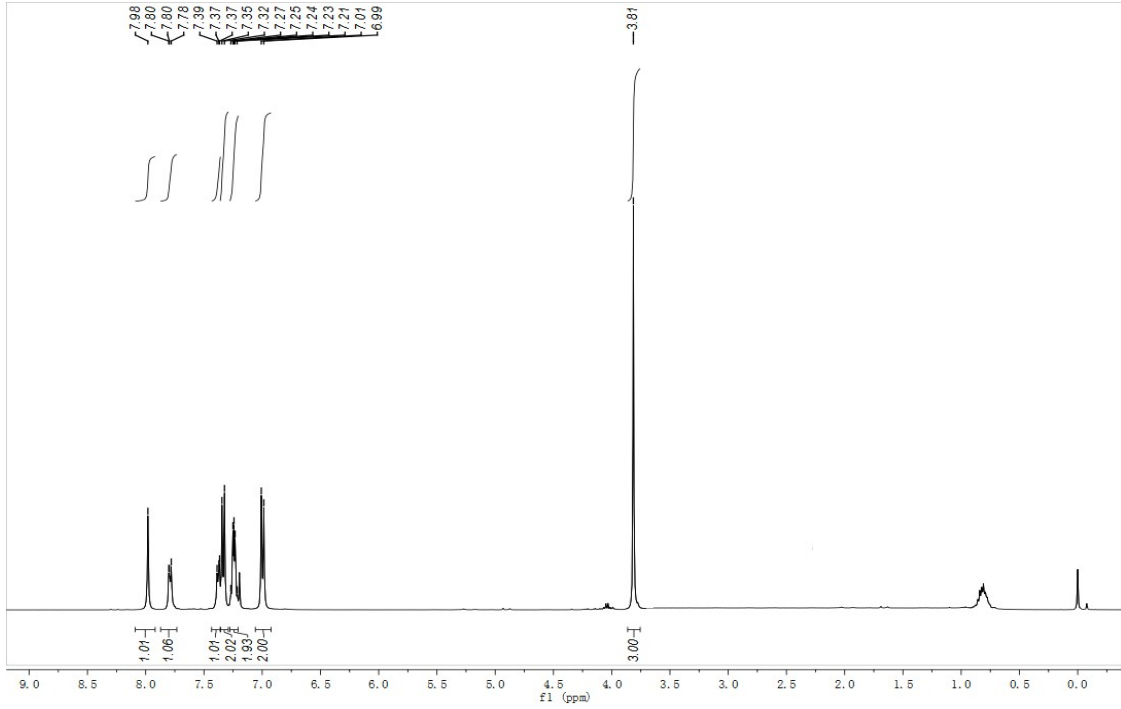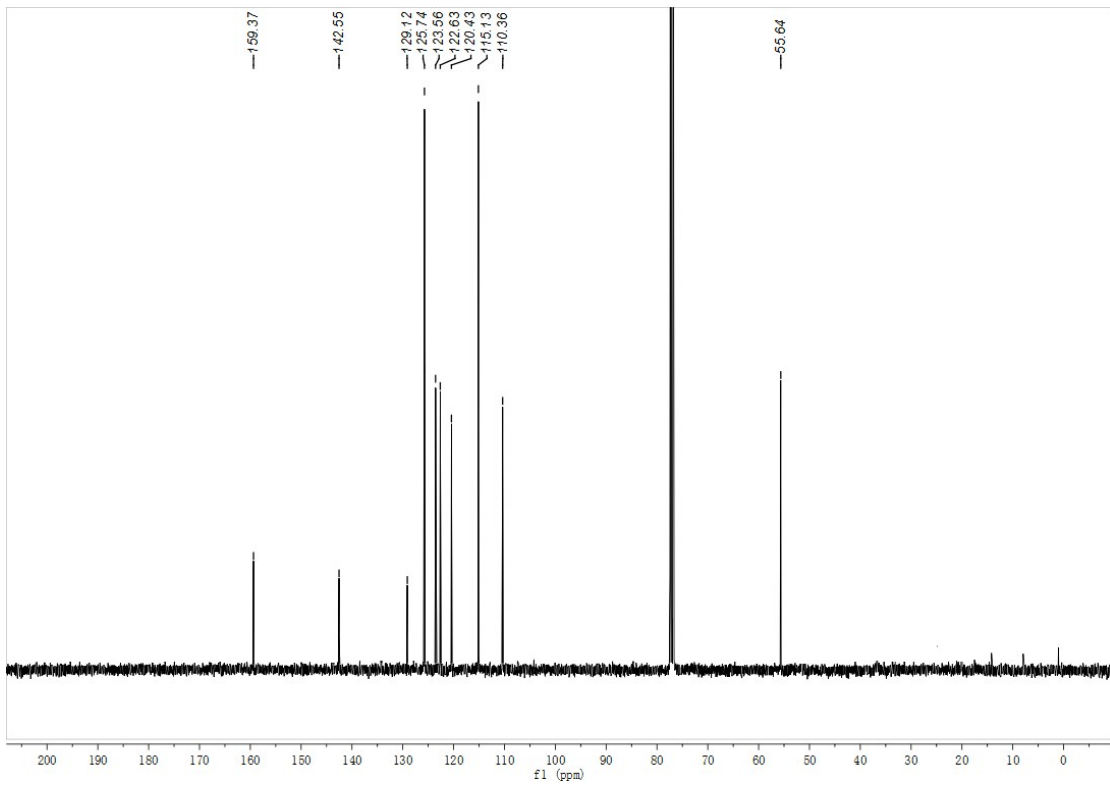



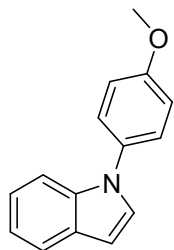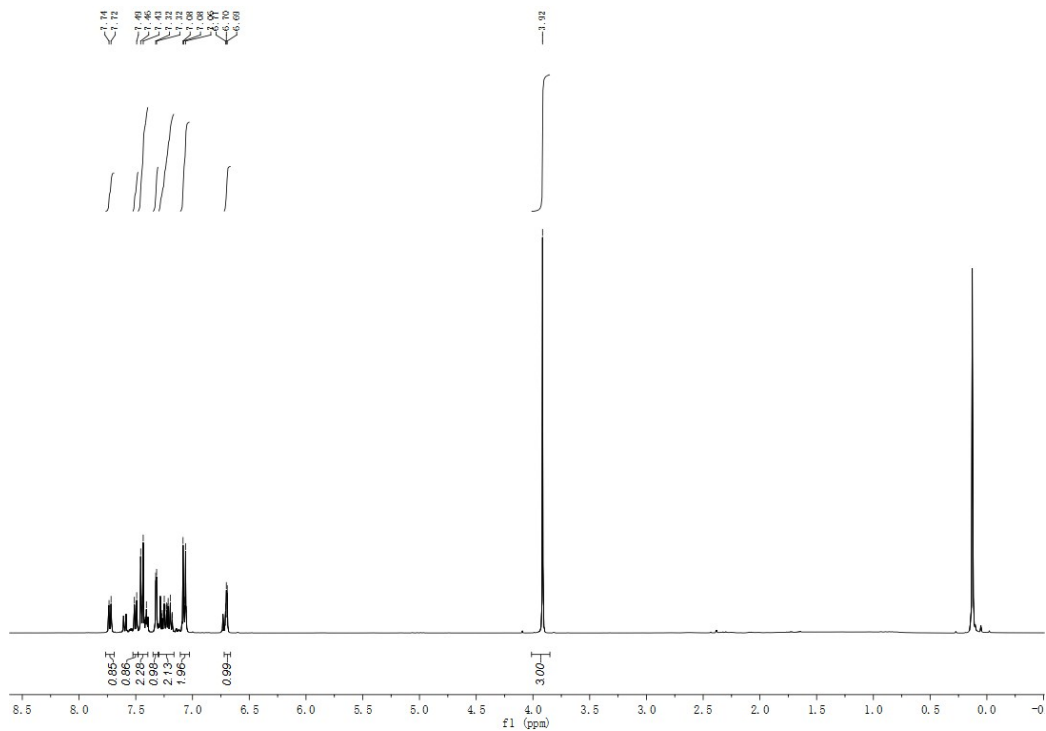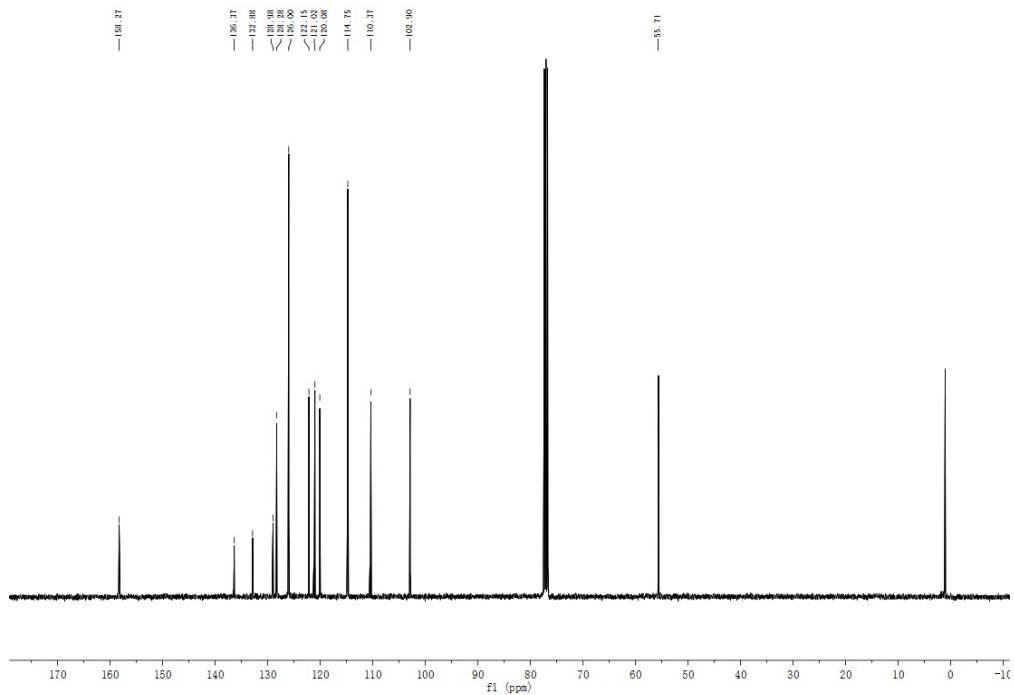

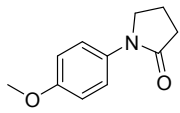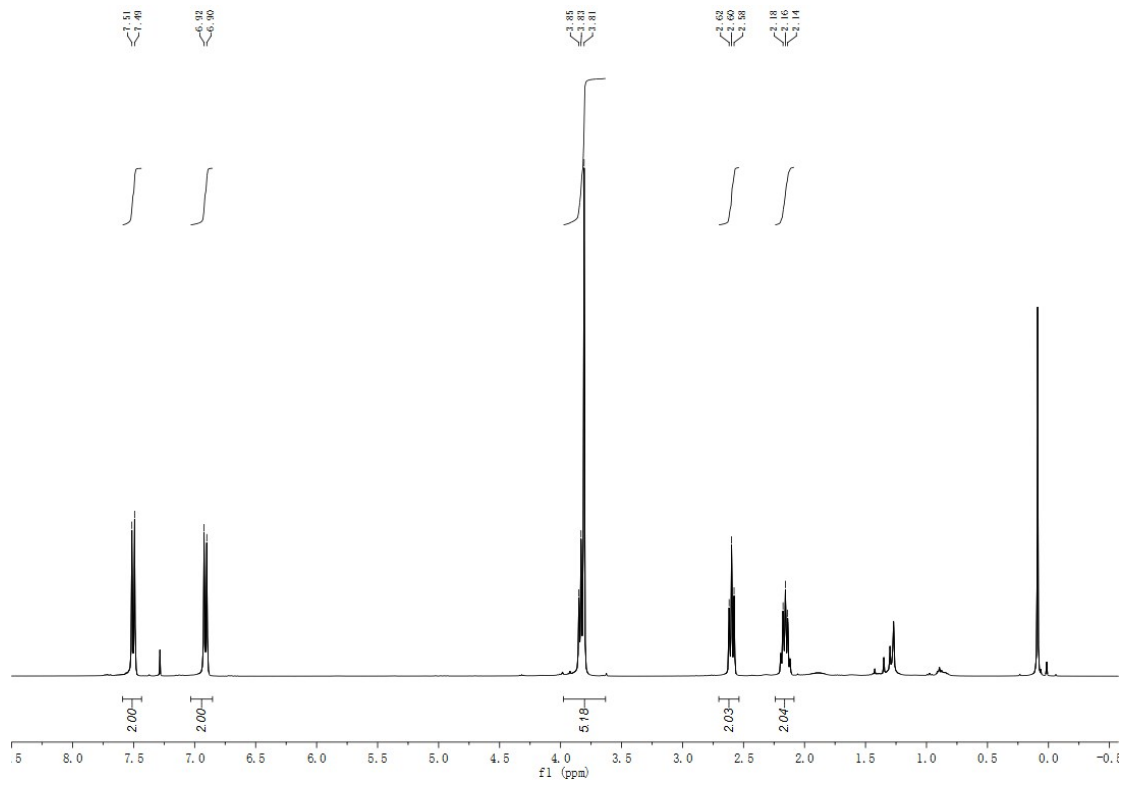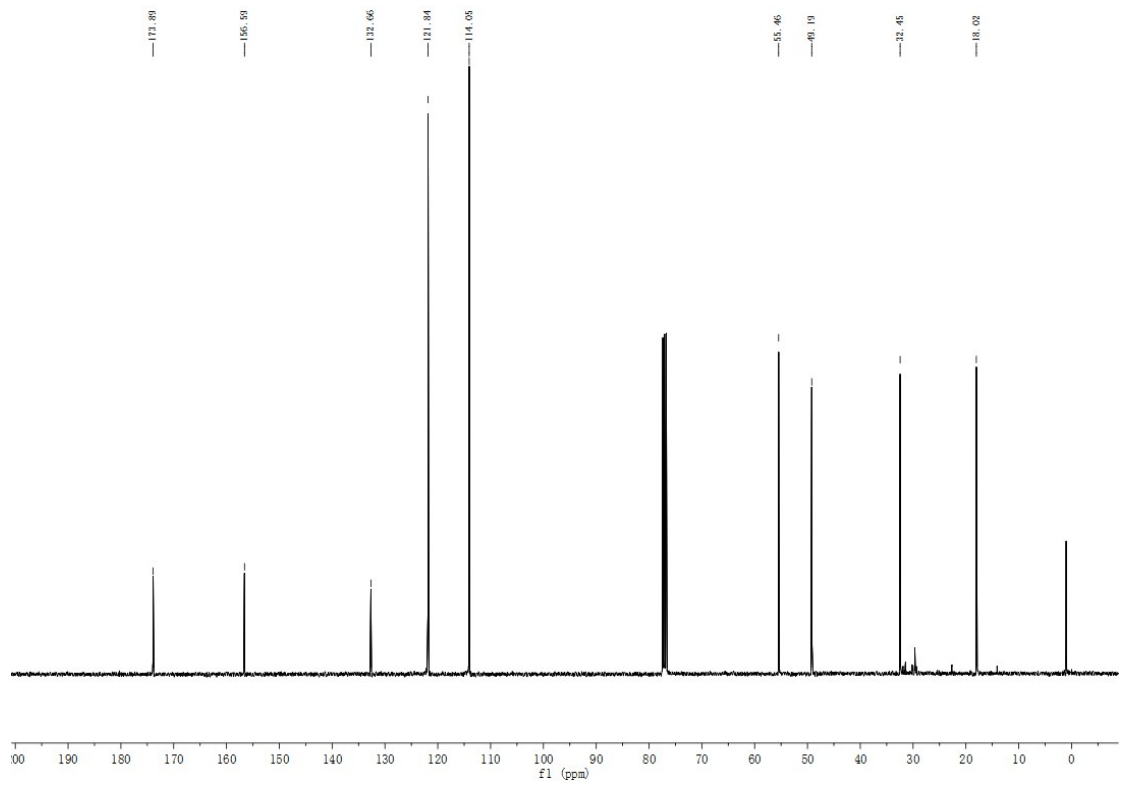

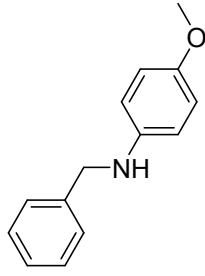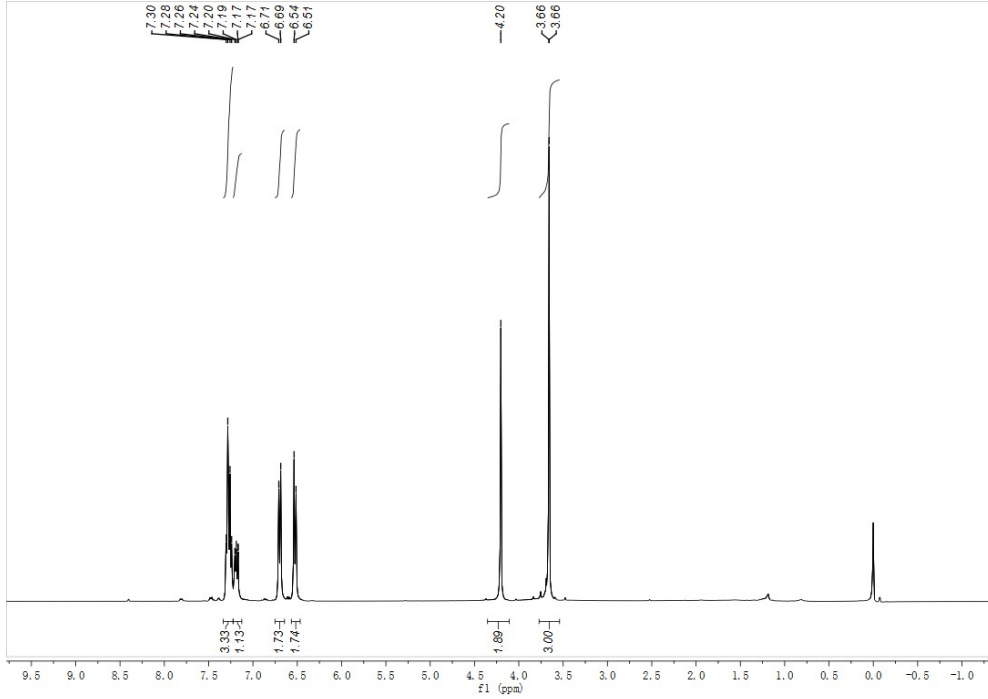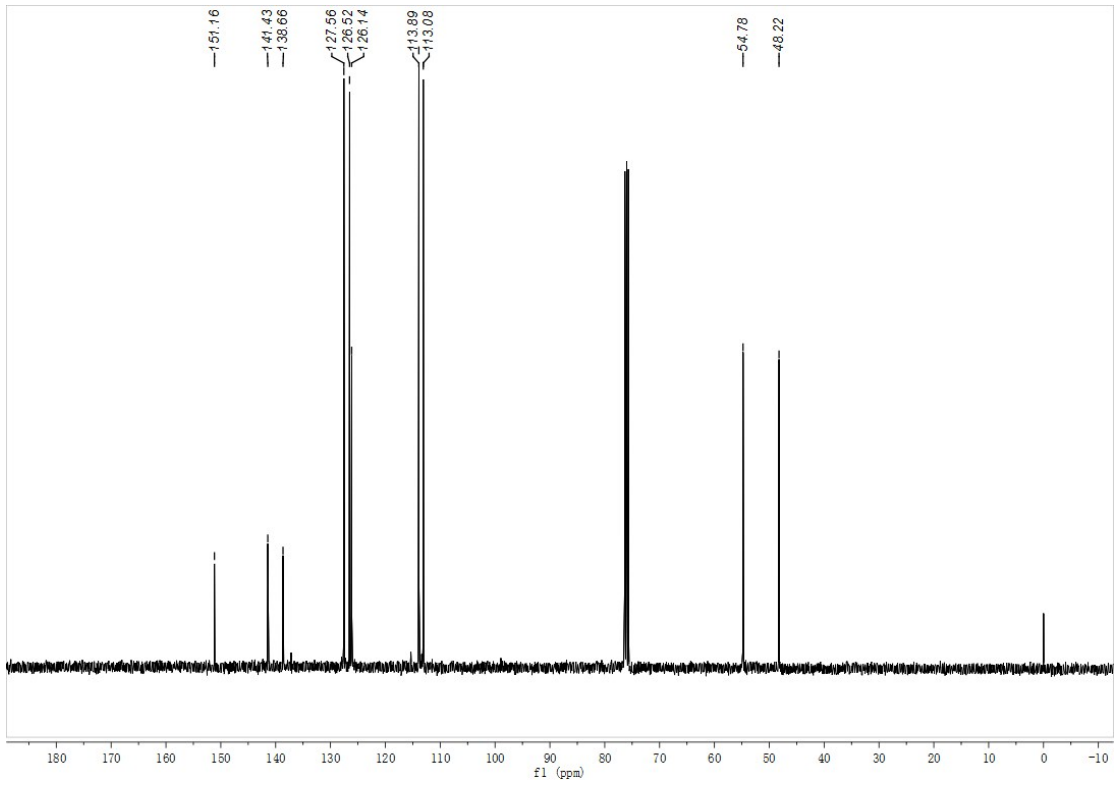

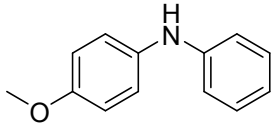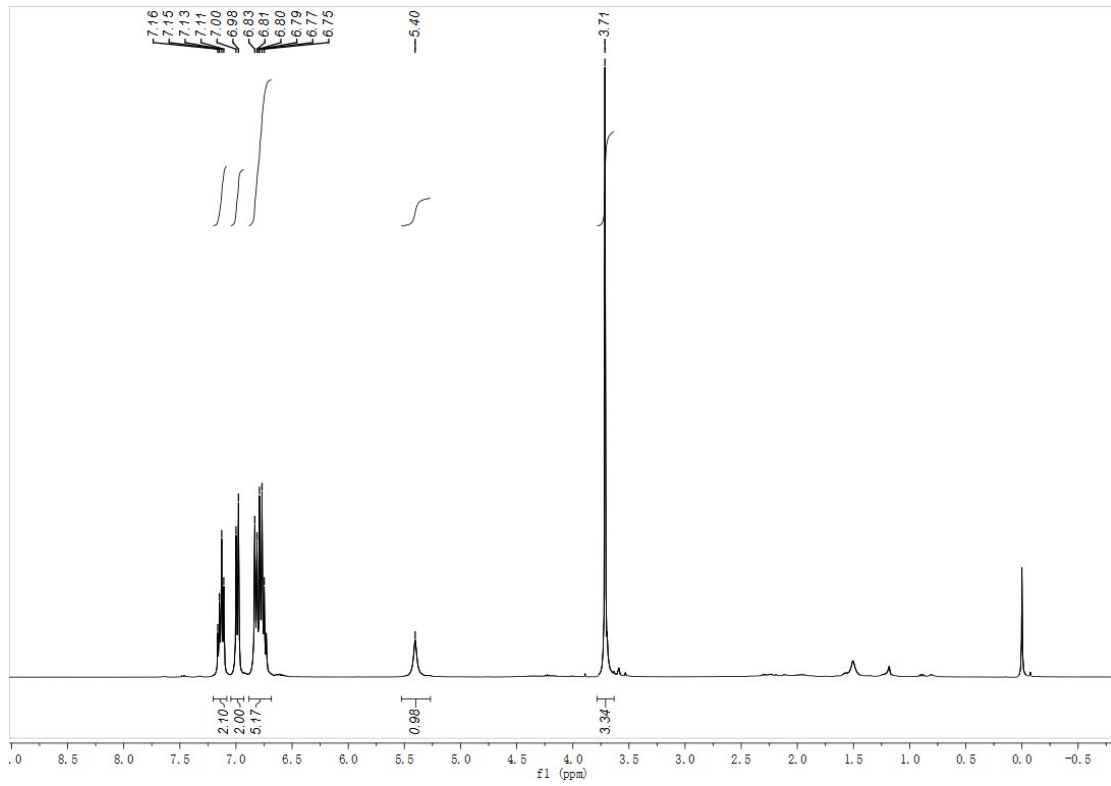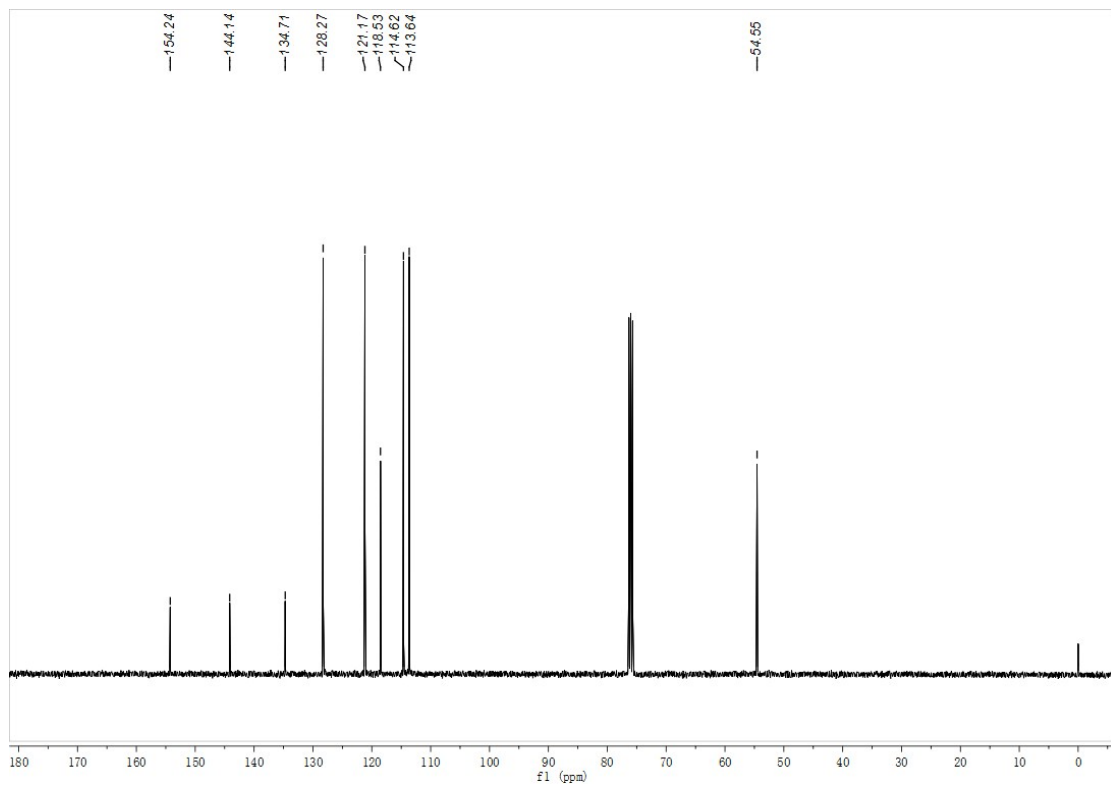

Supplement: c6ra13536f1.pdf [file c6ra13536f1.pdf]
